# Supplementary material for: Fabrication of BP2T functionalized graphene via non-covalent π–π stacking interactions for enhanced ammonia detection
Source: Royal Society of Chemistry journal article supplement (doi:10.1039/d1ra06879b), 2021-01-01
Supplement: d1ra06879b1.pdf [file d1ra06879b1.pdf]

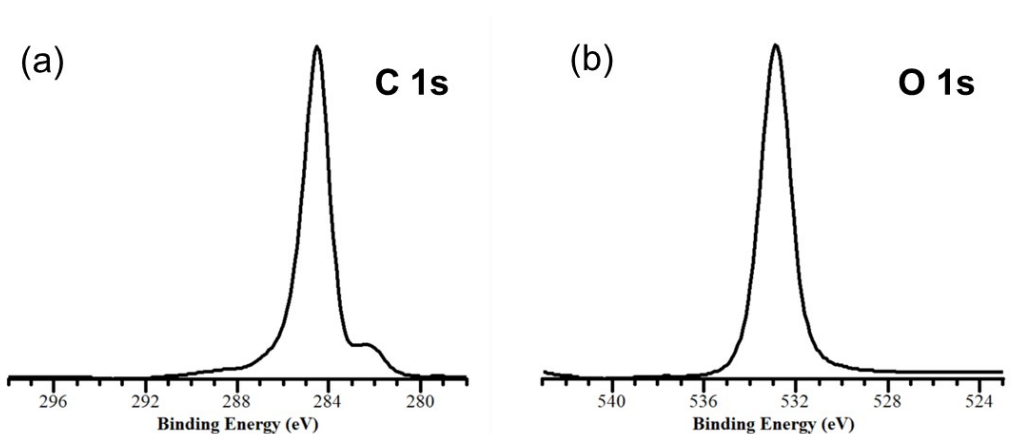

**Figure S1.** XPS (a) C 1s and (b) O 1s spectrum of the graphene after non-covalent BP2T functionalization.

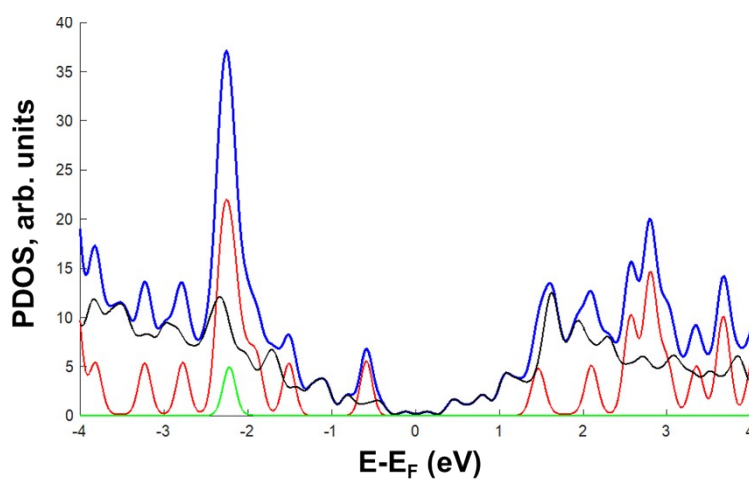

**Figure S2.** Projected density of states (blue) expanded into graphene (black), BP2T (red) and  $NH_3$  contributions.

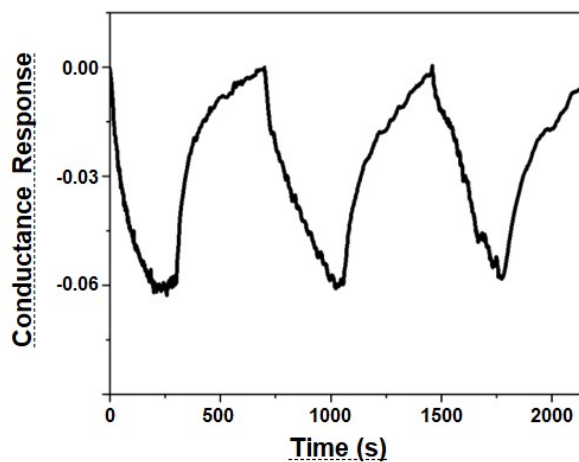

Figure S3. The multiple gas sensing experiment of graphene sensor with 2h non-covalent BP2T functionalization time after 3-month fabrication.

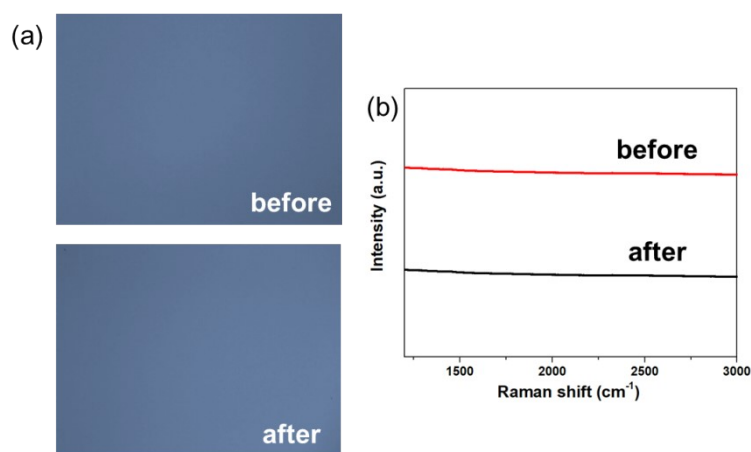

Figure S4. Control experiment by using a SiO<sub>2</sub>/Si substrate immersed in the BP2T/toluene solution

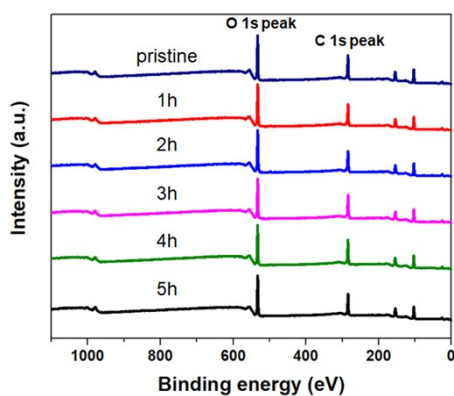

Figure S5. XPS survey comparison of graphene with various non-covalent BP2T functionalization time from pristine (0h) to 5h.
